# Supplementary material for: Thermoelectric energy from flexible P3HT films doped with a ferric salt of triflimide anions
Source: Royal Society of Chemistry journal article supplement (doi:10.1039/c2ee23006b), 2012-01-01
Supplement: c2ee23006b.pdf [file c2ee23006b.pdf]

## Supporting Information

# Thermoelectric Energy from Flexible P3HT Films Doped by a Ferric Salt of Triflimide Anions

Qian Zhang<sup>a,b</sup>, Yimeng Sun<sup>a,b</sup>, Wei Xu<sup>\*a</sup> and Daoben Zhu<sup>\*a</sup>

*Received (in XXX, XXX) Xth XXXXXXXXX 200X, Accepted Xth XXXXXXXXX 200X*

DOI: 10.1039/b000000x

<sup>a</sup> Beijing National Laboratory for Molecular Sciences, Key Laboratory of Organic Solids, Institute of Chemistry, Chinese Academy of Sciences, Beijing 100190, China. Fax: +86 10 6256 9349; Tel.: +86 10 6263 9355 E-mail: wxu@iccas.ac.cn; zhudb@iccas.ac.cn

<sup>b</sup> Graduate University of Chinese Academy of Sciences, Beijing 100039, China.

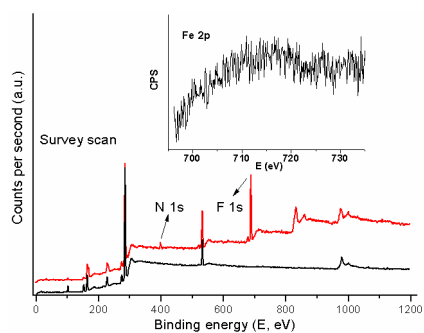

**Fig. S1** Survey scan of XPS characterization for P3HT films before (black) and after doping (red). The inset shows detail of Fe(2p).

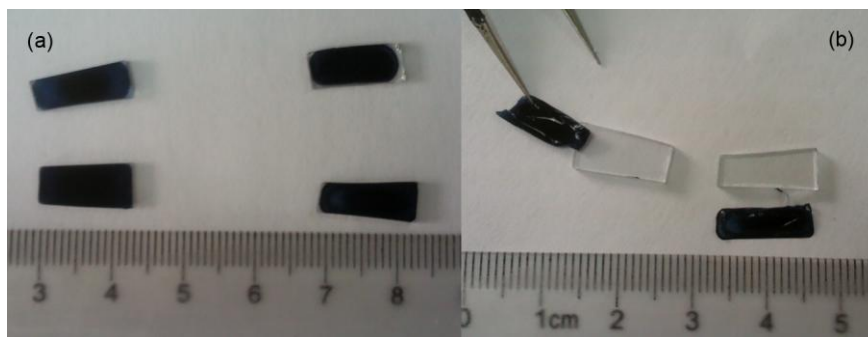

**Fig. S2** P3HT-TFSI films (a) before and (b) after being detached from substrates with tweezers.

**Table S1.** Summary of thermoelectric property of P3HT at room temperature ever reported and obtained in this work.

| Matrix                               | Dopant (solvent)                    | Electrical conductivity [S cm <sup>-1</sup> ] | Seebeck coefficient [μV K <sup>-1</sup> ] | Power factor [μW m <sup>-1</sup> K <sup>-2</sup> ] |
|--------------------------------------|-------------------------------------|-----------------------------------------------|-------------------------------------------|----------------------------------------------------|
| P3HT <sup>1</sup><br>(film, 1.75 μm) | F4-TCNQ<br>(chlorobenzene)          | 3.8 × 10 <sup>-4</sup>                        | 400                                       | 0.006                                              |
| P3HT <sup>2</sup><br>(film, 1 μm)    | NOPF <sub>6</sub><br>(acetonitrile) | 2.2                                           | 25                                        | 0.14                                               |
| P3HT <sup>3</sup><br>(film, 15 μm)   | FeCl <sub>3</sub><br>(chloroform)   | 7                                             | 74                                        | 3.9                                                |
| P3HT <sup>4</sup><br>(film, 5 μm)    | FeCl <sub>3</sub><br>(chloroform)   | 8.9 × 10 <sup>-3</sup>                        | 5400                                      | 26                                                 |
| P3HT <sup>a</sup><br>(film, 0.7 μm)  | FeCl <sub>3</sub><br>(nitromethane) | 21                                            | 30                                        | 1.9                                                |
| P3HT <sup>b</sup><br>(film, 0.7 μm)  | NOPF <sub>6</sub><br>(acetonitrile) | 10                                            | 36                                        | 1.3                                                |

<sup>ab</sup> Samples doped by dopants ever reported are prepared in this work for comparison. FeCl<sub>3</sub> solution (in nitromethane, 10 mg ml<sup>-1</sup>) and NOPF<sub>6</sub> solution (in acetonitrile, 5 mM) are used and the immersing time was 1.5 and 0.2 hours respectively.

**Table S2.** Carrier density of doped P3HT films extracted from temperature dependence of Seebeck coefficient according to Mott relation or from XPS measurement.

| Formula                                                                                          | $\frac{S}{T} = \frac{\pi^2 k_B^2 m^*}{(3\pi^2)^{2/3} \hbar^2  e  n^{2/3}}$ |                                 | $n = N \cdot \rho$                                                                        |                                |
|--------------------------------------------------------------------------------------------------|----------------------------------------------------------------------------|---------------------------------|-------------------------------------------------------------------------------------------|--------------------------------|
| Available parameters                                                                             | Effective mass <sup>5</sup><br>[m*, kg]                                    | 1.7 m <sub>e</sub> <sup>a</sup> | Oxidation ratio (ρ) <sup>b</sup><br>Density of states [N, cm <sup>-3</sup> ] <sup>6</sup> | 0.32<br>5.2 × 10 <sup>21</sup> |
| Extracted parameters                                                                             | Carrier density<br>[n, cm <sup>-3</sup> ]                                  | 1.62 × 10 <sup>21</sup>         | Carrier density<br>[n, cm <sup>-3</sup> ]                                                 | 1.66 × 10 <sup>21</sup>        |
| Electrical conductivity<br>at supposed carrier<br>mobility <sup>c</sup> (σ, S cm <sup>-1</sup> ) | μ = 0.2 cm <sup>2</sup> V <sup>-1</sup> s <sup>-1</sup>                    | 51.8                            | μ = 0.2 cm <sup>2</sup> V <sup>-1</sup> s <sup>-1</sup>                                   | 53.1                           |
|                                                                                                  | μ = 0.3 cm <sup>2</sup> V <sup>-1</sup> s <sup>-1</sup>                    | 77.7                            | μ = 0.3 cm <sup>2</sup> V <sup>-1</sup> s <sup>-1</sup>                                   | 79.7                           |
|                                                                                                  | μ = 0.35 cm <sup>2</sup> V <sup>-1</sup> s <sup>-1</sup>                   | 90.7                            | μ = 0.35 cm <sup>2</sup> V <sup>-1</sup> s <sup>-1</sup>                                  | 93.0                           |

<sup>a</sup> m<sub>e</sub> is the rest mass of electrons; <sup>b</sup> oxidation ratio is defined as unit positive charge per thiophene monomer, determined by XPS as the area ratio of S(2p) peak around 168 eV to that around 164 eV; <sup>c</sup> although the estimated carrier mobility is above most results extracted from measurement in field-effect transistors of P3HT,<sup>7</sup> it is in accord with the mobility range of heavily doped P3HT.<sup>3,8</sup>

- 1 J. Sun, M. L. Yeh, B. J. Jung, B. Zhang, J. Feser, A. Majumdar, H. E. Katz, *Macromolecules*, 2010, **43**, 2897.
- 2 Y. Xuan, X. Liu, S. Desbief, P. Leclere, M. Fahlman, R. Lazzaroni, M. Berggren, J. Cornil, D. Emin and X. Crispin, *Phys. Rev. B*, 2010, **82**, 115454.
- 3 M. He, J. Ge, Z. Lin, X. Feng, X. Wang, H. Lu, Y. Yang and F. Qiu, *Energy Environ. Sci.*, 2012, **5**, 8351.
- 4 Y. Shinohara, K. Ohara, H. Nakanishi, Y. Imai and Y. Isoda, *Mater. Sci. Forum*, 2005, **492 - 493**, 141.
- 5 K. Lee, R. Menon, C. O. Yoon, A. J. Heeger, *Phys. Rev. B*, 1995, **52**, 4779.
- 6 L. G. Kaake, X. Y. Zhu, *J. Phys. Chem. C*, 2008, **112**, 16174.
- 7 D. A. Lyashenko, A. A. Zakhidov, V. A. Pozdin, G. G. Malliaras, *Org. Electron.*, 2010, **11**, 1507.
- 8 M. J. Panzer, C. D. Frisbie, *Adv. Funct. Mater.*, 2006, **16**, 1051.
